# Supplementary material
Source: MDPI journal article supplement (https://www.mdpi.com/2075-163X/12/5/600)
Supplement: s1 [file s1]

**Table S1.** The values of  $d$  (Å),  $I_{\text{rel}}$  (%) and corresponding phase ( $h, k, l$ ) for each peak of the XRD patterns of efflorescent minerals from Donnoe fumarole field (a, b, c) and Dachnoe thermal field (d, e, f).

| $d$ (Å)                                             | Phase name( $h,k,l$ )            | $I_{\text{rel}}$ (%) | $d$ (Å)                                                                                     | Phase name( $h,k,l$ )                                       | $I_{\text{rel}}$ (%) |
|-----------------------------------------------------|----------------------------------|----------------------|---------------------------------------------------------------------------------------------|-------------------------------------------------------------|----------------------|
| <b>a) Mutn-2017-2</b>                               |                                  |                      | <b>b) MDP-1-20-7s-a(2)</b>                                                                  |                                                             |                      |
| 7.420                                               | Gypsum(0,2,0)                    | 89                   | 7.179                                                                                       | Kaolinite(0,0,1)                                            | 87                   |
| 4.420                                               | Mascagnite(1,2,0)                | 16                   | 4.878                                                                                       | Letovicite(1,1,-1)                                          | 14                   |
| 4.232                                               | Gypsum(1,2,-1)                   | 100                  | 4.468                                                                                       | Kaolinite(0,2,0)                                            | 34                   |
| 4.001                                               | Mascagnite(2,0,0)                | 5                    | 4.345                                                                                       | Kaolinite(1,1,0),Tridymite(1,1,2)                           | 100                  |
| 3.752                                               | Gypsum(0,4,0),Mascagnite(2,1,0)  | 10                   | 4.159                                                                                       | Kaolinite(1,-1,-1),Tridymite(4,0,-4)                        | 81                   |
| 3.177                                               | Gypsum(1,1,-2),Mascagnite(2,2,0) | 3                    | 3.958                                                                                       | Tridymite(3,1,-1)                                           | 16                   |
| 3.037                                               | Gypsum(1,4,-1)                   | 88                   | 3.842                                                                                       | Kaolinite(0,2,-1),Tridymite(4,0,2),<br>Letovicite(1,0,1)    | 19                   |
| 2.846                                               | Gypsum(1,2,1)                    | 31                   | 3.733                                                                                       | Kaolinite(0,2,1),Tridymite(3,1,1),<br>Letovicite(0,0,2)     | 43                   |
| 2.818                                               | Mascagnite(2,2,1)                | 4                    | 3.571                                                                                       | Kaolinite(0,0,2),Letovicite(1,-2,-1)                        | 98                   |
| 2.763                                               | Gypsum(2,1,-1),Mascagnite(1,1,2) | 6                    | 3.373                                                                                       | Kaolinite(1,1,1),Tridymite(4,0,-6),<br>Letovicite(1,1,1)    | 11                   |
| 2.663                                               | Gypsum(0,5,1),Mascagnite(0,4,0)  | 22                   | 3.173                                                                                       | Tridymite(4,0,4)                                            | 2                    |
| 2.493                                               | Gypsum(2,0,-2),Mascagnite(3,1,0) | 3                    | 3.063                                                                                       | Kaolinite(1,-1,-2),Tridymite(6,0,-2)                        | 9                    |
| 2.476                                               | Gypsum(2,0,0)                    | 6                    | 2.965                                                                                       | Tridymite(6,0,-4),Letovicite(1,-3,0)                        | 12                   |
| 2.433                                               | Gypsum(2,2,-2),Mascagnite(2,3,1) | 4                    | 2.752                                                                                       | Kaolinite(0,2,2),Letovicite(1,3,0)                          | 6                    |
| 2.207                                               | Mascagnite(2,4,0)                | 16                   | 2.551                                                                                       | Kaolinite(1,-3,0),Tridymite(2,0,8)                          | 46                   |
| 2.075                                               | Gypsum(2,4,0),Mascagnite(2,4,1)  | 6                    | 2.496                                                                                       | Kaolinite(1,1,2),Tridymite(0,2,1),<br>Letovicite(0,0,3)     | 38                   |
| 2.062                                               | Gypsum(2,5,-1),Mascagnite(1,5,0) | 8                    | 2.379                                                                                       | Kaolinite(0,0,3),Tridymite(2,0,-10)                         | 17                   |
| 1.890                                               | Gypsum(2,3,-3),Mascagnite(4,0,1) | 8                    | 2.337                                                                                       | Kaolinite(1,1,-3),Tridymite(7,1,-4)                         | 63                   |
| 1.871                                               | Mascagnite(3,2,2)                | 8                    | 2.294                                                                                       | Kaolinite(1,3,1),Tridymite(0,0,10)                          | 32                   |
| 1.774                                               | Gypsum(0,3,3),Mascagnite(4,2,1)  | 12                   | 2.223                                                                                       | Kaolinite(2,2,-1),Tridymite(5,1,5),<br>Letovicite(0,4,1)    | 11                   |
| 1.617                                               | Mascagnite(2,6,0)                | 5                    | 2.188                                                                                       | Kaolinite(2,2,0)                                            | 3                    |
| Used ICDD cards: gypsum #01-086-0943,<br>mascagnite |                                  |                      | 1.990                                                                                       | Kaolinite(2,-2,1),Tridymite-M,                              | 26                   |
|                                                     |                                  |                      | 1.944                                                                                       | Kaolinite(1,3,2),Tridymite-M,                               | 9                    |
|                                                     |                                  |                      | 1.895                                                                                       | Kaolinite(1,4,1),Tridymite(5,1,-11),<br>Letovicite(2,-4,-1) | 21                   |
| <b>c) MDP-1-20-4s</b>                               |                                  |                      | 1.840                                                                                       | Kaolinite(1,0,-                                             | 12                   |
| 7.640                                               | Sulfur(1,1,1)                    | 15                   | 1.787                                                                                       | Kaolinite(0,0,4),Tridymite(6,2,3)                           | 5                    |
| 5.734                                               | Sulfur(1,1,3)                    | 9                    | 1.745                                                                                       | Unknown                                                     | 1                    |
| 4.887                                               | Sulfur(2,0,2)                    | 6                    | 1.659                                                                                       | Kaolinite(2,-4,-                                            | 46                   |
| 4.269                                               | Sulfur(1,1,5)                    | 8                    | 1.619                                                                                       | Kaolinite(1,3,3),Tridymite(8,2,2),Let                       | 17                   |
| 4.046                                               | Sulfur(2,2,0)                    | 21                   | 1.585                                                                                       | Kaolinite(3,2,-2),Letovicite(1,3,3)                         | 3                    |
| 3.844                                               | Sulfur(2,2,2)                    | 100                  | 1.543                                                                                       | Kaolinite(1,-1,4),Tridymite(9,1,-12)                        | 3                    |
| 3.563                                               | Sulfur(1,3,3)                    | 9                    | Used ICDD cards: kaolinite #00-060-0345, tridymite<br>#00-018-1170, letovicite #00-042-1426 |                                                             |                      |
| 3.446                                               | Sulfur(0,2,6)                    | 24                   |                                                                                             |                                                             |                      |
| 3.337                                               | Sulfur(2,2,4)                    | 29                   |                                                                                             |                                                             |                      |
| 3.207                                               | Sulfur(0,4,0)                    | 69                   | <b>d) DM-1-20-5s-(1)</b>                                                                    |                                                             |                      |
| 3.105                                               | Sulfur(3,1,3)                    | 26                   | 13.4                                                                                        | Alunogen(0,2,0)                                             | 11                   |
| 2.844                                               | Sulfur(0,4,4)                    | 14                   | 7.10                                                                                        | Alunogen(1,0,0)                                             | 15                   |
| 2.679                                               | Sulfur(3,3,1)                    | 4                    | 6.65                                                                                        | Alunogen(0,4,0)                                             | 2                    |
| 2.620                                               | Sulfur(1,3,7)                    | 8                    | 5.090                                                                                       | Jarosite(0,1,2),Alunogen(1,-4,0)                            | 18                   |
| 2.560                                               | Sulfur(1,1,9)                    | 10                   | 4.487                                                                                       | Alunogen(0,4,-1)                                            | 100                  |
| 2.504                                               | Sulfur(2,4,4)                    | 30                   | 4.358                                                                                       | Tridymite(2,2,0),Alunogen(1,-3,-1)                          | 97                   |
| 2.422                                               | Sulfur(3,1,7)                    | 10                   | 4.045                                                                                       | Cristobalite(1,0,1),Alunogen(1,2,1)                         | 72                   |

|                                     |                                                          |     |                                                                                                                  |                                                                            |     |
|-------------------------------------|----------------------------------------------------------|-----|------------------------------------------------------------------------------------------------------------------|----------------------------------------------------------------------------|-----|
| 2.371                               | Sulfur(4,2,2)                                            | 9   | 3.913                                                                                                            | Tridymite(2,2,2),Alunogen(1,3,1)                                           | 31  |
| 2.283                               | Sulfur(0,2,10)                                           | 5   | 3.669                                                                                                            | Jarosite(1,1,0),Alunogen(2,0,0)                                            | 19  |
| 2.216                               | Sulfur(1,5,5)                                            | 4   | 3.343                                                                                                            | Alunogen(1,7,0)                                                            | 72  |
| 2.142                               | Sulfur(1,1,11)                                           | 6   | 3.202                                                                                                            | Tridymite(4,2,0),Alunogen(2,-3,-1)                                         | 45  |
| 2.112                               | Sulfur(3,1,9)                                            | 15  | 3.095                                                                                                            | Cristobalite(1,1,1),Jarosite(0,2,1),<br>Alunogen(2,3,-1)                   | 31  |
| 1.988                               | Sulfur(3,5,3)                                            | 4   | 2.976                                                                                                            | Cristobalite(1,0,2),Tridymite(2,2,4),<br>Jarosite(2,0,2),Alunogen(1,8,0)   | 22  |
| 1.956                               | Sulfur(2,6,2)                                            | 1   | 2.487                                                                                                            | Cristobalite(1,1,2),Tridymite(0,4,0),<br>Jarosite(0,2,4),Alunogen(2,-7,-1) | 36  |
| 1.902                               | Sulfur(5,1,5)                                            | 10  | 2.325                                                                                                            | Cristobalite(2,0,1),Tridymite(2,2,6),<br>Alunogen(3,-1,-1)                 | 10  |
| 1.834                               | Sulfur(3,1,11)                                           | 6   | 2.278                                                                                                            | Jarosite(1,0,7),Alunogen(2,9,0)                                            | 11  |
| 1.781                               | Sulfur(3,5,7)                                            | 8   | 2.131                                                                                                            | Tridymite(0,0,8),Alunogen(2,-10,-1)                                        | 13  |
| 1.754                               | Sulfur(1,7,3)                                            | 5   | 2.012                                                                                                            | Cristobalite(2,0,2),Alunogen(3,0,-2)                                       | 7   |
| 1.724                               | Sulfur(6,0,2)                                            | 7   | 1.980                                                                                                            | Cristobalite(1,1,3),Jarosite(3,0,3)                                        | 14  |
| 1.698                               | Sulfur(1,7,5)                                            | 3   | 1.923                                                                                                            | Tridymite(8,2,0),Jarosite(0,2,7)                                           | 9   |
| 1.646                               | Sulfur(5,3,7)                                            | 4   | 1.874                                                                                                            | Cristobalite(2,1,2)                                                        | 7   |
| 1.620                               | Sulfur(3,7,1)                                            | 5   | 1.829                                                                                                            | Cristobalite(0,0,4),Tridymite(6,2,6),<br>Jarosite(2,2,0)                   | 18  |
| Used ICDD card: sulfur #01-083-2285 |                                                          |     | Used ICDD cards: alunogen #00-026-1010, jarosite #00-010-0443, tridymite #00-042-1401, cristobalite #00-039-1425 |                                                                            |     |
|                                     |                                                          |     |                                                                                                                  |                                                                            |     |
| <b>e) Dch-2-18-4</b>                |                                                          |     | <b>f) DM-1-20-3s(2)</b>                                                                                          |                                                                            |     |
| 13.36                               | Alunogen(0,2,0)                                          | 19  | 18.70                                                                                                            | Copiapite(0,1,0)                                                           | 6   |
| 7.18                                | Alunogen(1,0,0),Alum-Na(1,1,1)                           | 30  | 10.53                                                                                                            | Halotrichite(0,2,1)                                                        | 5   |
| 4.90                                | Alunite(0,1,2),Alunogen(1,-4,0)                          | 8   | 9.460                                                                                                            | Halotrichite(0,1,2),Copiapite(0,2,0)                                       | 19  |
| 4.493                               | Alunogen(1,2,-1)                                         | 63  | 7.910                                                                                                            | Halotrichite(0,2,2)                                                        | 11  |
| 4.371                               | Alunogen(0,4,-1),Alum-Na(2,2,0)                          | 91  | 6.410                                                                                                            | Halotrichite(0,1,3),Copiapite(0,0,1),<br>Melanterite(2,0,0)                | 9   |
| 4.048                               | Alunogen(1,-2,1),Alum-                                   | 100 | 6.050                                                                                                            | Halotrichite(0,2,3),Copiapite(0,3,0)                                       | 23  |
| 3.909                               | Alunogen(1,-3,1)                                         | 34  | 5.542                                                                                                            | Halotrichite(1,2,-1),Copiapite(1,-1,-1),<br>Melanterite(1,0,-2)            | 7   |
| 3.592                               | Alunite(1,0,4),Alunogen(2,0,0),Alum-Na(3,1,1)            | 39  | 5.264                                                                                                            | Halotrichite(0,3,3),Copiapite(1,1,-1)                                      | 6   |
| 3.348                               | Alunogen(1,-7,0),Alum-Na(3,1,2)                          | 57  | 4.81                                                                                                             | Halotrichite(1,1,-3),Copiapite(1,2,-1),<br>Melanterite(1,1,1)              | 100 |
| 3.098                               | Alunogen(2,-3,-1),Alum-Na(4,0,0),<br>Opal                | 18  | 4.59                                                                                                             | Halotrichite(1,2,-3),<br>Copiapite(0,3,1), Melanterite(1,0,2)              | 17  |
| 2.993                               | Alunite(0,1,5),Alunogen(1,-7,-1),<br>Alum-Na(4,1,0)      | 48  | 4.30                                                                                                             | Halotrichite(1,0,-4),Copiapite(1,3,0)                                      | 43  |
| 2.850                               | Alunite(0,0,6),Alunogen(0,8,-1),<br>Alum-Na(3,3,1), Opal | 22  | 4.12                                                                                                             | Halotrichite(1,1,3)                                                        | 36  |
| 2.766                               | Alunogen(1,-2,-2),Alum-Na(4,2,0)                         | 4   | 3.96                                                                                                             | Halotrichite(1,2,3),Copiapite(0,4,-1),<br>Melanterite(3,0,-2)              | 26  |
| 2.625                               | Alunogen(1,-4,-2)                                        | 13  | 3.76                                                                                                             | Halotrichite(0,6,2),Copiapite(0,4,1),<br>Melanterite(3,1,-1)               | 27  |
| 2.545                               | Alunogen(2,-5,1),Alum-Na(4,2,2)                          | 22  | 3.62                                                                                                             | Halotrichite(1,5,-2),Copiapite(2,-1,0)                                     | 4   |
| 2.487                               | Alunite(0,2,4),Alunogen(2,-7,-1),<br>Alum-Na(4,3,0),Opal | 68  | 3.49                                                                                                             | Halotrichite(1,2,4),Copiapite(2,0,-1)                                      | 71  |
| 2.334                               | Alunogen(2,6,1),Alum-Na(5,1,1)                           | 38  | 3.34                                                                                                             | Halotrichite(1,3,4)                                                        | 3   |
| 2.282                               | Alunite(2,1,1),Alunogen(1,-7,-2),<br>Alum-Na(5,2,1)      | 18  | 3.28                                                                                                             | Halotrichite(1,6,-2),Copiapite(1,2,-2)                                     | 9   |
| 2.195                               | Alum-Na(4,4,0)                                           | 4   | 3.18                                                                                                             | Halotrichite(1,4,-5),Copiapite(2,2,-1),<br>Melanterite(2,1,2)              | 6   |

|                                                                                                      |                                                          |    |                                                                                                    |                                                                 |    |
|------------------------------------------------------------------------------------------------------|----------------------------------------------------------|----|----------------------------------------------------------------------------------------------------|-----------------------------------------------------------------|----|
| 2.120                                                                                                | Alunogen(3,0,1)                                          | 6  | 3.05                                                                                               | Halotrichite(0,7,3),Copiapite(1,4,1),<br>Melanterite(1,2,-1)    | 13 |
| 2.024                                                                                                | Alunite(0,1,8),Alunogen(3,-<br>7,0),Alum-Na(6,1,0), Opal | 16 | 2.97                                                                                               | Halotrichite(1,6,-4),Copiapite(2,-1,1)                          | 6  |
| 1.979                                                                                                | Alunogen(3,0,-2),Alum-Na(6,0,2)                          | 15 | 2.89                                                                                               | Halotrichite(0,7,4),Copiapite(1,-4,-<br>2), Melanterite(2,2,-1) | 10 |
| 1.913                                                                                                | Alunite(3,0,3),Alum-Na(6,1,2), Opal                      | 15 | 2.83                                                                                               | Halotrichite(1,0,6)                                             | 9  |
| 1.869                                                                                                | Alum-Na(6,2,2), Opal                                     | 13 | 2.78                                                                                               | Halotrichite(2,2,-4),Copiapite(0,6,1)                           | 10 |
| 1.827                                                                                                | Alum-Na(6,3,0)                                           | 18 | 2.72                                                                                               | Melanterite(2,2,1)                                              | 7  |
| 1.782                                                                                                | Alum-Na(4,4,4)                                           | 3  | 2.68                                                                                               | Halotrichite(1,8,-2),Copiapite(1,6,0)                           | 8  |
| 1.672                                                                                                | Alum-Na(6,1,4)                                           | 17 | 2.61                                                                                               | Halotrichite(2,1,3)                                             | 6  |
| 1.616                                                                                                | Alum-Na(7,2,2)                                           | 9  | 2.56                                                                                               | Copiapite(1,3,2),Melanterite(4,1,-3)                            | 8  |
| 1.540                                                                                                | Alum-Na(8,1,0)                                           | 16 | 2.46                                                                                               | Melanterite(1,0,4)                                              | 5  |
| 1.491                                                                                                | Alum-Na(8,2,0)                                           | 27 | 2.39                                                                                               | Copiapite(3,-2,0),Melanterite(3,1,-4)                           | 7  |
| 2.195                                                                                                | Alum-Na(4,4,0)                                           | 4  | 2.29                                                                                               | Copiapite(0,2,3),Melanterite(4,2,-2)                            | 16 |
| 2.120                                                                                                | Alunogen(3,0,1)                                          | 6  | 2.24                                                                                               | Copiapite(3,-1,-2)                                              | 5  |
| 2.024                                                                                                | Alunite(0,1,8),Alunogen(3,-<br>7,0),Alum-Na(6,1,0), Opal | 16 | 2.09                                                                                               | Copiapite(2,-8,-1),Melanterite(1,3,-<br>1)                      | 3  |
| Used ICDD cards: alunite #00-004-0865, alunogen<br>#00-026-1010, alum-Na #01-074-5108, opal #00-038- |                                                          |    | Used ICDD cards: melanterite # 00-001-0255,<br>copiapite # 00-035-0583, halotrichite # 00-039-1387 |                                                                 |    |

**Table S2.** The chemical composition of the thermal water and gas-condensate from the Dachnue thermal field

|                                    | Dch2/21<br>w | Dch6/21<br>w | Dch8/21<br>w | Dch9/21<br>w | Dch3/21<br>w | Dch5/21<br>w | Dch11/21<br>w | Dch2/21c<br>* |
|------------------------------------|--------------|--------------|--------------|--------------|--------------|--------------|---------------|---------------|
| <b>pH</b>                          | 2.4          | 2.4          | 2.9          | 2.7          | 6.4          | 4.7          | 3.5           | 5.3           |
|                                    | meq/l         | meq/l         |
| <b>HCO<sub>3</sub><sup>-</sup></b> | 0,00         | 0,00         | 0,00         | 0,00         | 0,44         | 0,02         | 0,00          | 0,18          |
| <b>Cl<sup>-</sup></b>              | 0,00         | 0,00         | 0,00         | 0,00         | 0,00         | 0,00         | 0,00          | 0,00          |
| <b>SO<sub>4</sub><sup>2-</sup></b> | 14,26        | 16,63        | 14,32        | 12,80        | 2,00         | 3,60         | 6,23          | 0,40          |
| <b>HSO<sub>4</sub><sup>+</sup></b> | 1,07         | 1,29         | 0,24         | 0,40         | 0,00         | 0,00         | 0,09          | 0,00          |
| <b>F</b>                           | 0,00         | 0,00         | 0,01         | 0,01         | 0,00         | 0,00         | 0,00          | 0,00          |
| <b>Σ A</b>                         | <b>15,33</b> | <b>17,91</b> | <b>14,57</b> | <b>13,21</b> | <b>2,44</b>  | <b>3,62</b>  | <b>6,31</b>   | <b>0,58</b>   |
| <b>H<sup>+</sup></b>               | 4,62         | 4,74         | 1,16         | 2,06         | 0,00         | 0,00         | 0,36          | 0,00          |
| <b>Li<sup>+</sup></b>              | 0,00         | 0,00         | 0,00         | 0,00         | 0,00         | 0,00         | 0,00          | 0,00          |
| <b>Na<sup>+</sup></b>              | 0,53         | 0,56         | 0,74         | 1,11         | 0,91         | 0,48         | 0,41          | 0,00          |
| <b>K<sup>+</sup></b>               | 0,26         | 0,29         | 0,34         | 0,42         | 0,33         | 0,16         | 0,12          | 0,00          |
| <b>Ca<sup>2+</sup></b>             | 2,75         | 2,98         | 3,33         | 2,87         | 1,25         | 0,50         | 0,31          | 0,20          |
| <b>Mg<sup>2+</sup></b>             | 0,90         | 1,20         | 2,53         | 1,77         | 0,27         | 0,32         | 0,34          | 0,01          |
| <b>Fe<sup>3+</sup></b>             | 3,76         | 0,41         | 0,11         | 1,27         | 0,00         | 0,01         | 0,19          | 0,00          |
| <b>Fe<sup>2+</sup></b>             | 0,00         | 0,65         | 3,10         | 0,80         | 0,00         | 0,00         | 0,16          | 0,00          |
| <b>Al<sup>3+</sup></b>             | 1,76         | 1,55         | 0,81         | 0,43         | 0,00         | 0,00         | 0,62          | 0,00          |
| <b>NH<sub>4</sub><sup>+</sup></b>  | 1,25         | 5,00         | 2,33         | 2,33         | 0,26         | 1,67         | 3,33          | 0,35          |
| <b>Σ K</b>                         | <b>15,83</b> | <b>17,38</b> | <b>14,47</b> | <b>13,08</b> | <b>3,01</b>  | <b>3,13</b>  | <b>5,84</b>   | <b>0,56</b>   |

\* gas condensate
